# Supplementary material
Source: Research Square preprint supplement (doi:10.21203/rs.3.rs-9712876/v1)
Supplement: Supplementary file 1 [file ba214cb2cdf66cd59a7351b8.docx]

Supplementary Appendix: Prompts Used for Figures

“Rewiring the Myeloma Care Pathway With Artificial Intelligence: From First Clue to Faster Cures” by Freeman et al.

Appendix: Prompts for Figures 1, 2, and 3

**Figure 1. AI Across the Myeloma Ecosystem**

Prompt Used: Generate Figure 1. AI Across the Myeloma Ecosystem. Do not include the title or any figure legend in the image generated.

Design concept

A systems-level schematic with AI as connective tissue

Layout (radial or layered):

Center: AI / ML / Foundation Models

Outer domains (clockwise):

Detection & Diagnosis

SPEP / MS

Flow cytometry

Digital pathology

Genomics

Risk Stratification

Baseline prognosis

Early response dynamics

Toxicity prediction

Treatment Selection

Regimen matching

Sequencing optimization

Monitoring & Surveillance

MRD

Longitudinal labs

Imaging drift

Clinical Trials

Eligibility automation

Synthetic controls

Endpoint adjudication

Drug Development

Target discovery

In silico screening

Trial simulation

Visual cues

Multimodal inputs → unified latent space

Feedback loops (learning health system)

**Figure 2. The Evolving Role of AI in Transforming the Patient Care Continuum.**

Prompt Used: Generate Figure 2. The Evolving Role of AI in Transforming the Patient Care Continuum. Do not include the title or any figure legend in the image generated.

Design concept

A longitudinal timeline from first abnormal lab → survivorship.

X-axis:

Incidental abnormality

Diagnostic workup

Induction therapy

Relapse monitoring

Long-term follow-up

Y-axis layers (stacked bands):

Clinical Decisions

Data Generated

AI Interventions

Patient Impact

Example callouts

Early signal detection from routine labs

Response trajectory modeling after cycle 1–2

Real-time toxicity risk recalibration

Dynamic relapse prediction before biochemical progression

**Figure 3. The Digital Transformation of the Pharmaceutical Value Chain: An Integrated AI-Enabled Framework for Clinical Trials and Drug Discovery.**

Prompt Used: Generate Figure 3: The Digital Transformation of the Pharmaceutical Value Chain: An Integrated AI-Enabled Framework for Clinical Trials and Drug Discovery. Do not include the title or any legend in the figure.

Design concept

A dual-track pipeline: Trial Optimization ↔ Drug Discovery.

Left: Clinical Trials

Automated eligibility extraction

Trial matching engines

Line-of-therapy harmonization

Endpoint adjudication via LLMs

Synthetic control arms

Adaptive trial redesign

Right: Drug Discovery

Target prioritization from multimodal patient data

In silico CAR / antibody design

Virtual screening

Digital twin simulations

Early safety signal detection

Bridge between them

Shared patient representations

Continuous learning from real-world data

Feedback from post-approval outcomes

Optional inset
